# Supplementary material for: A planar Fe2B monolayer with room temperature antiferromagnetism
Source: Royal Society of Chemistry journal article supplement (doi:10.1039/d5cp01417d), 2025-01-01
Supplement: d5cp01417d1.pdf [file d5cp01417d1.pdf]

**Supplementary Information**  
**Planar Fe<sub>2</sub>B Monolayer with Room Temperature Antiferromagnetism**

| <b>Index</b>                                                                                                       | <b>Page</b> |
|--------------------------------------------------------------------------------------------------------------------|-------------|
| 1. Young's modulus and Poisson's ratio of the Fe <sub>2</sub> B monolaye                                           | 2           |
| 2. Six different magnetic configurations of the Fe <sub>2</sub> B monolayer                                        | 3           |
| 3. The temperature-depended M <sub>Z</sub> and C <sub>V</sub> the Fe <sub>2</sub> B monolayer under biaxial strain | 4           |
| 4. Spin-polarized band structure of the Fe <sub>2</sub> B monolayer under biaxial strain                           | 5           |
| 5. Partial density of states (PDOS) of Fe atoms in the Fe <sub>2</sub> B monolayer under biaxial strain            | 6           |

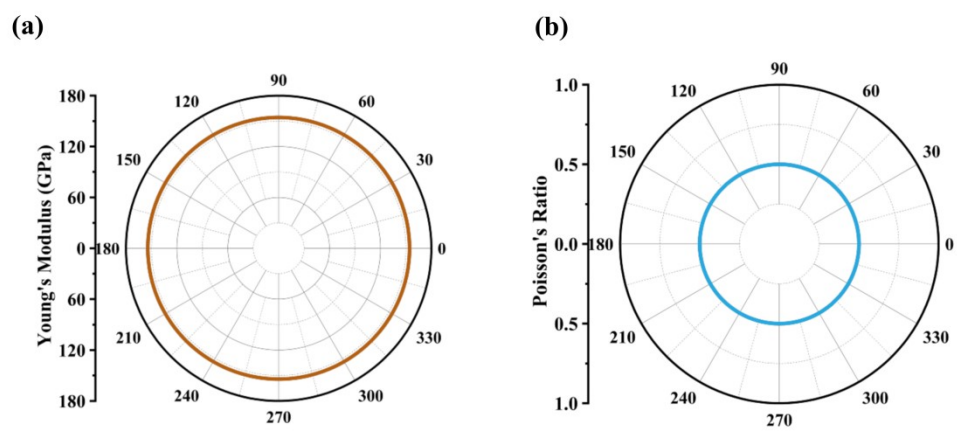

**Fig. S1** (a) Young's modulus and (b) Poisson's ratio of the  $\text{Fe}_2\text{B}$  monolayer.

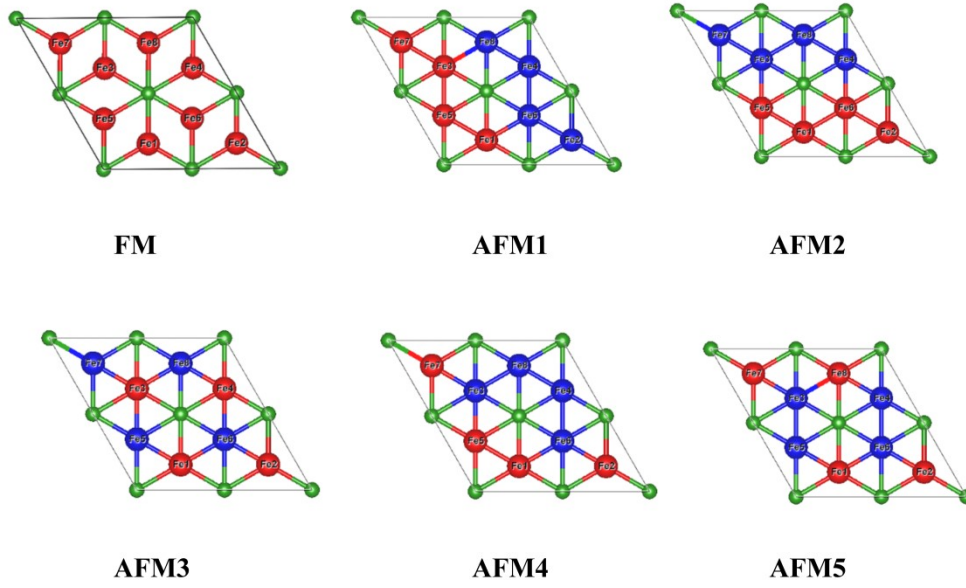

**Fig. S2** Six different magnetic configurations of the  $\text{Fe}_2\text{B}$  monolayer, the red and blue balls represent spin-up and spin-down Fe atoms, respectively.

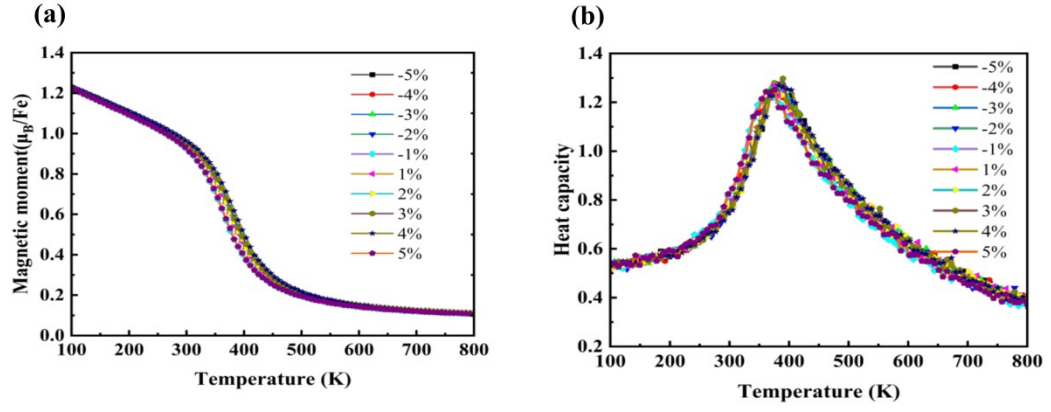

**Fig. S3** (a) The temperature-depended  $M_Z$  and (b)  $C_V$  the Fe<sub>2</sub>B monolayer under biaxial strain.

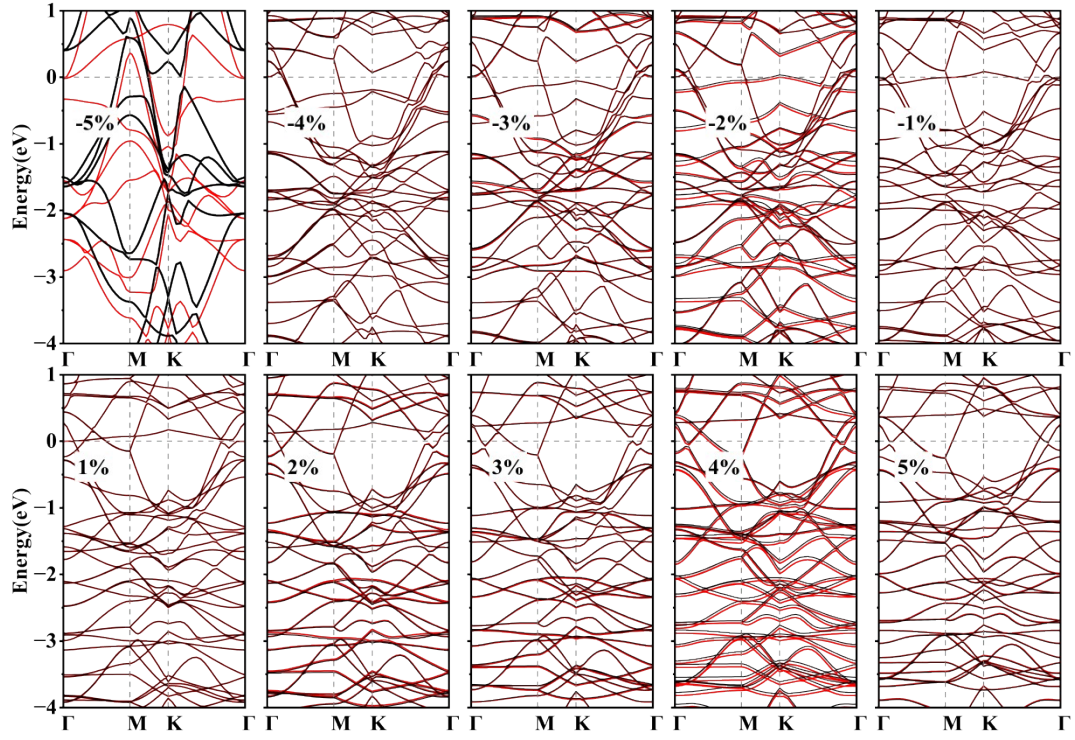

**Fig. S4** Spin-polarized band structure of the  $\text{Fe}_2\text{B}$  monolayer under biaxial strain.

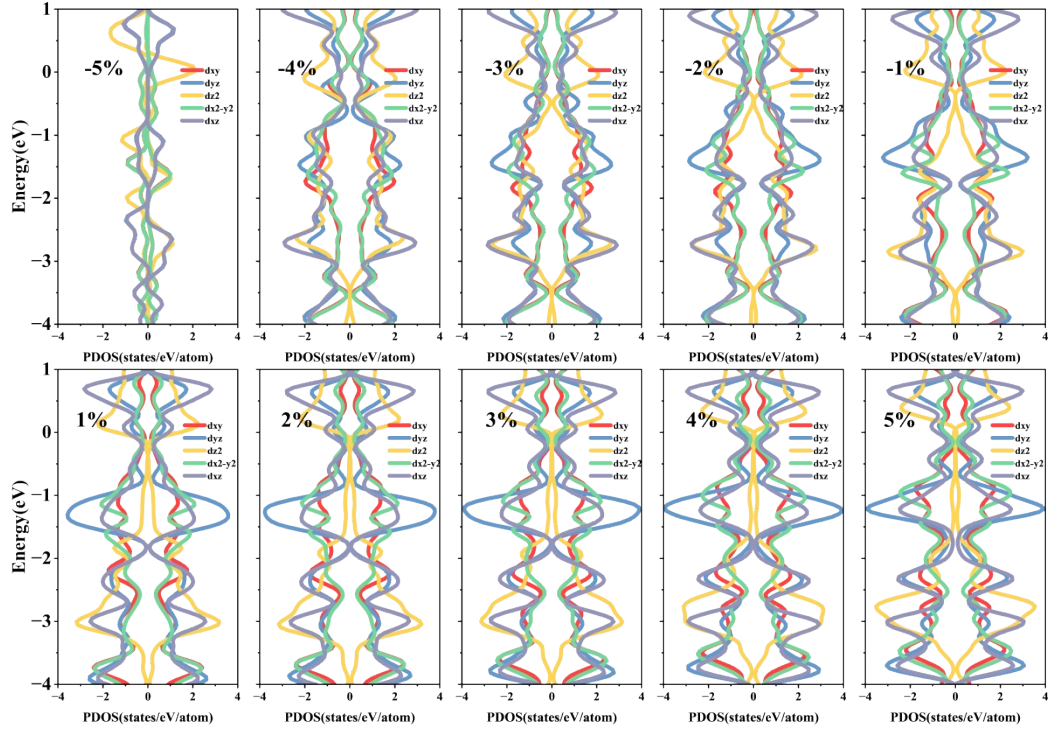

**Fig. S5** Partial density of states (PDOS) of Fe atoms in the Fe<sub>2</sub>B monolayer under biaxial strain.
